# Supplementary material
Source: PubMed Central journal article supplement (PMC4169172)

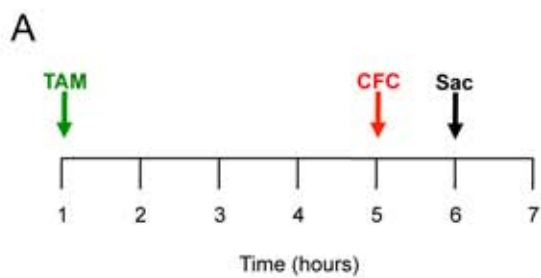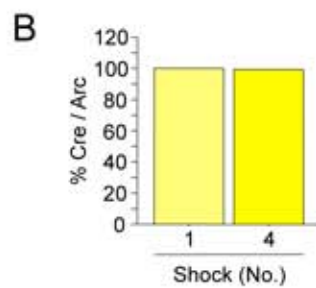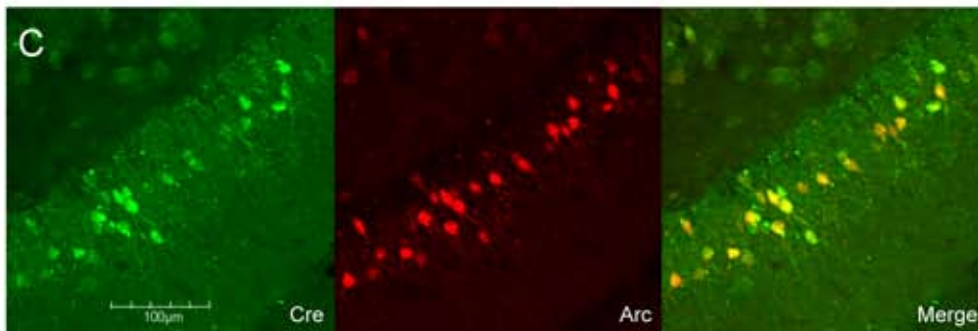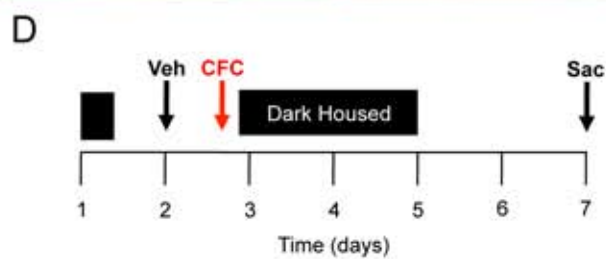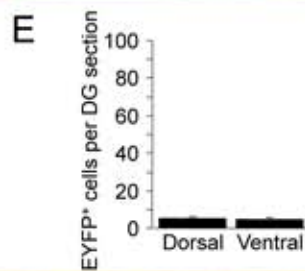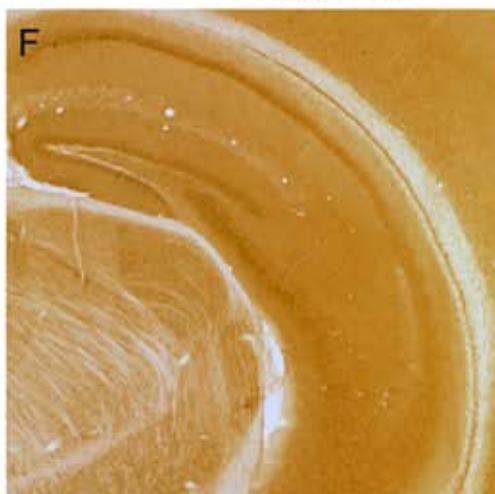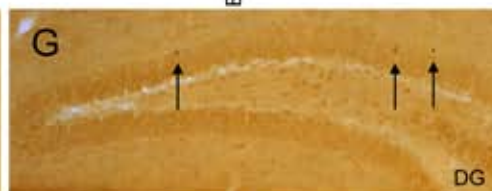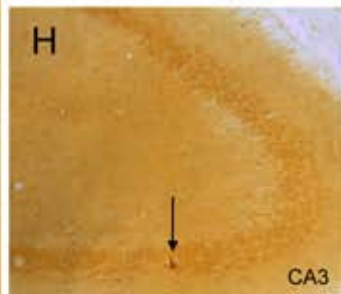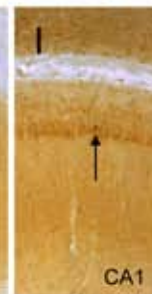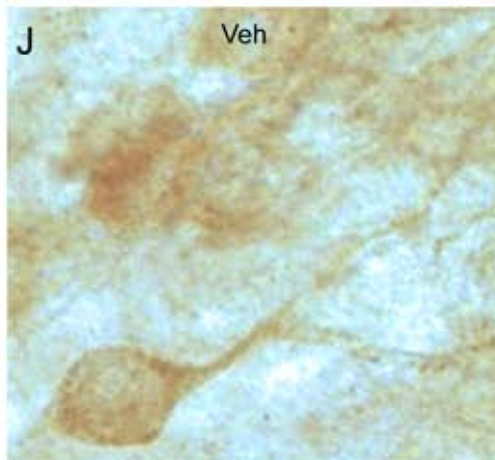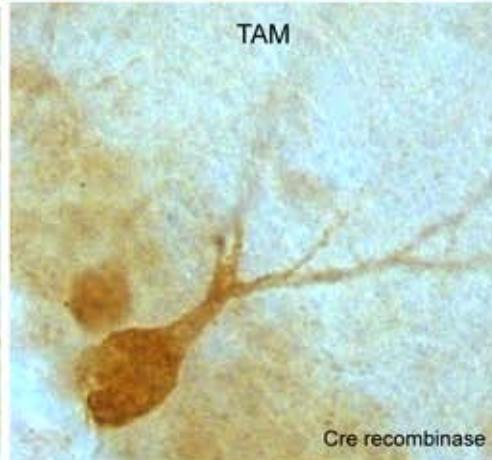

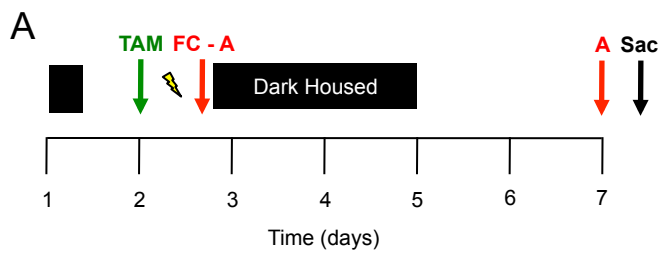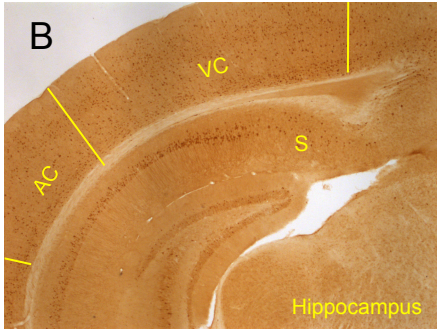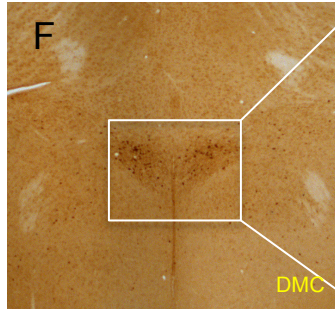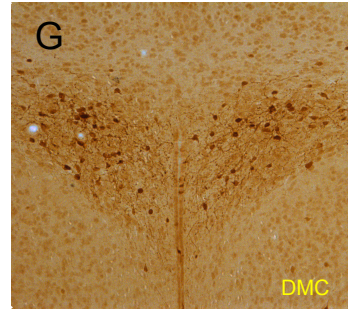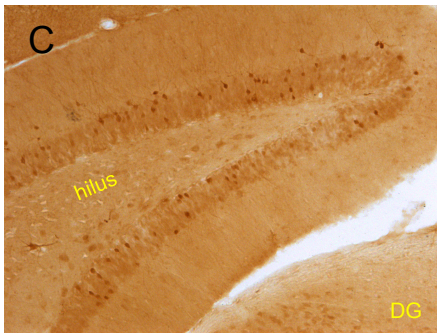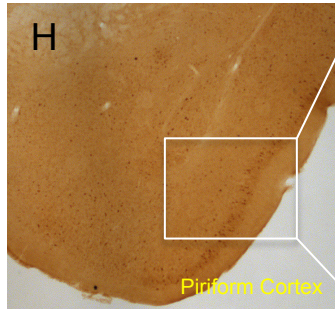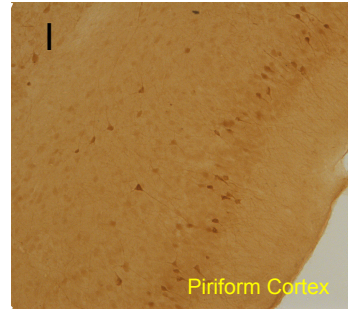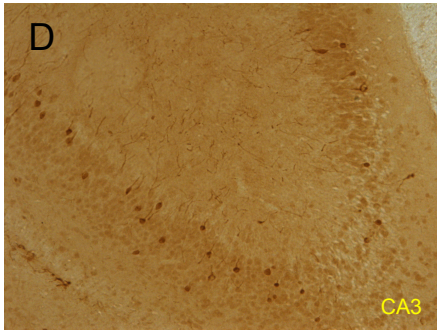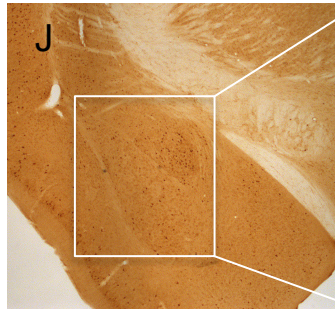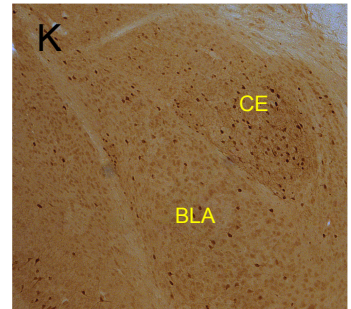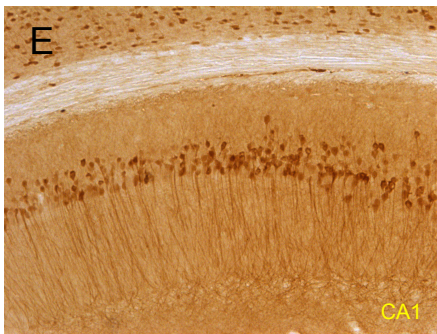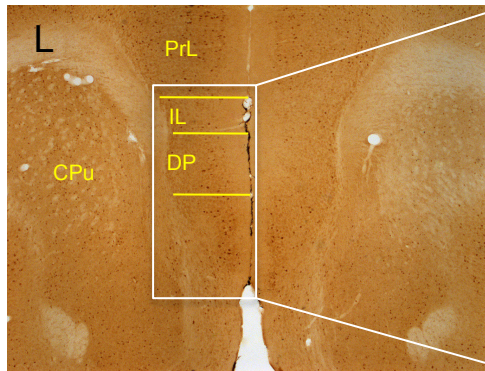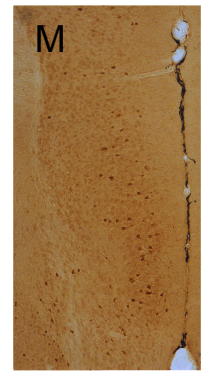

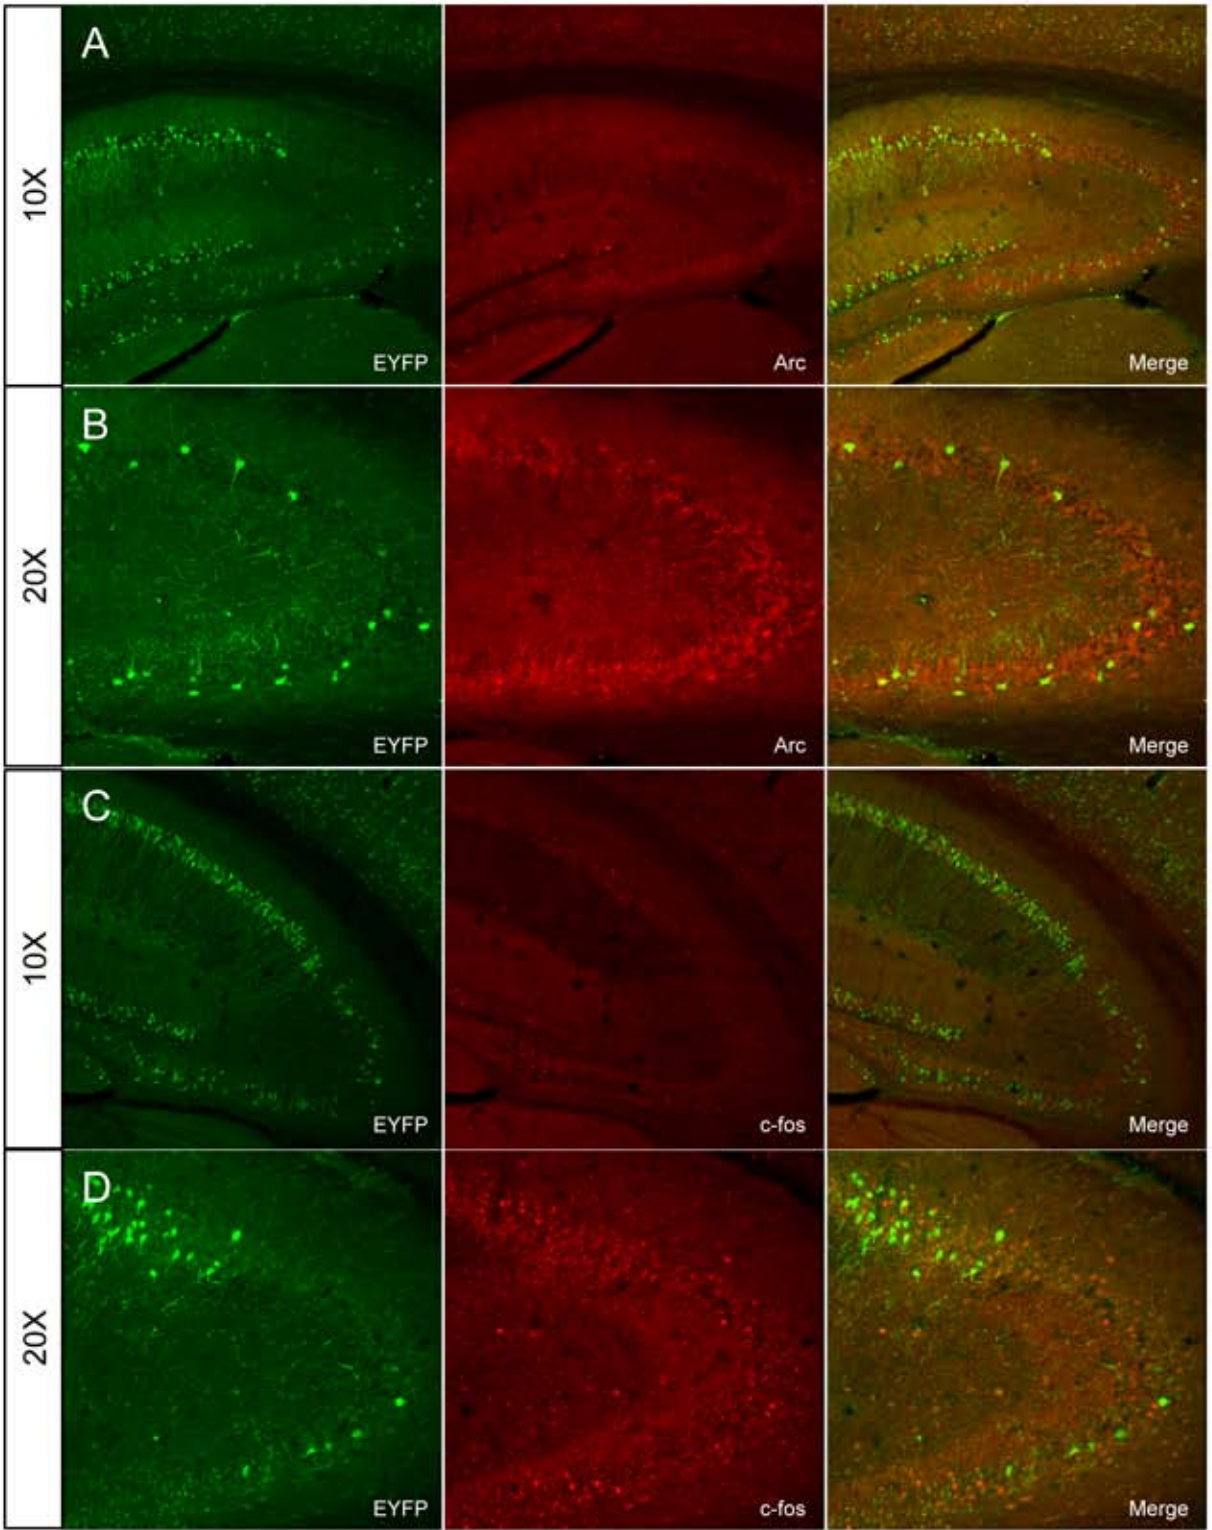

A

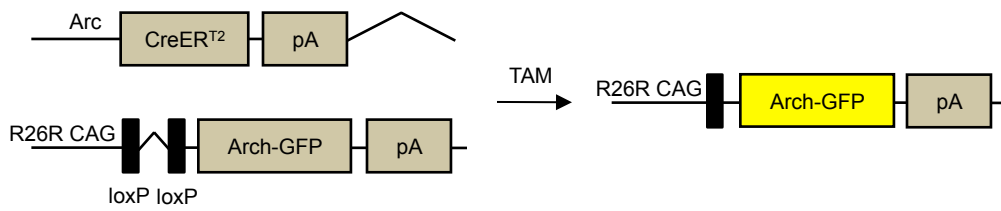

B

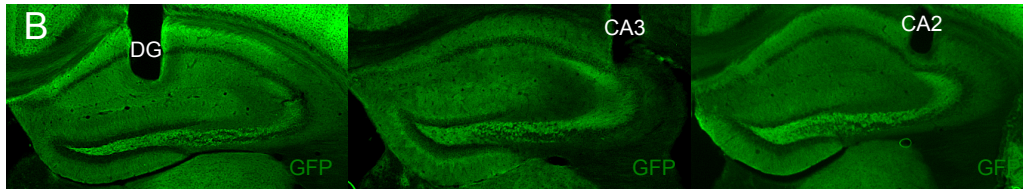

Coordinates:

**DG:** -1.5 mm AP, +/-1.0 mm ML, and -1.7 mm DV  
**CA3:** -1.34 mm AP, +/-1.9 mm ML, and -1.82 mm DV  
**CA2:** -1.4 mm AP, +/- 1.7 mm ML, and -1.6 mm DV

C

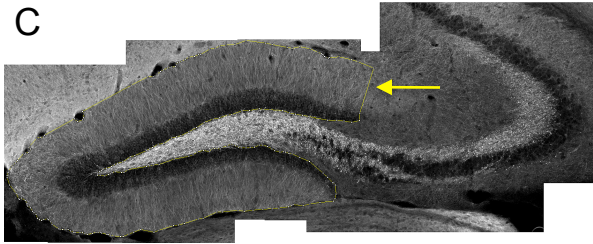

D

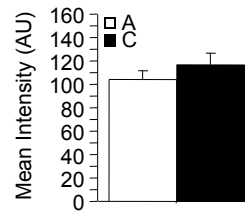

E

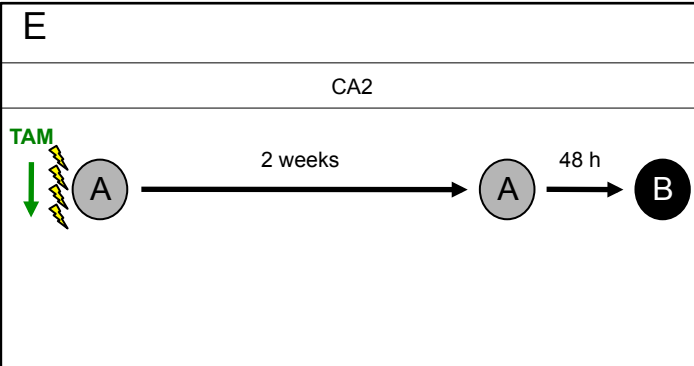

F

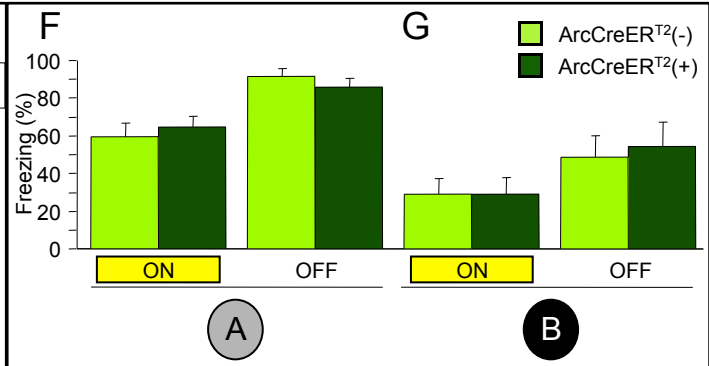

G

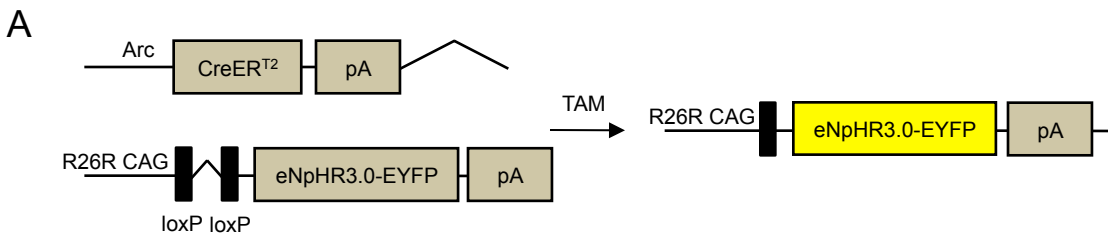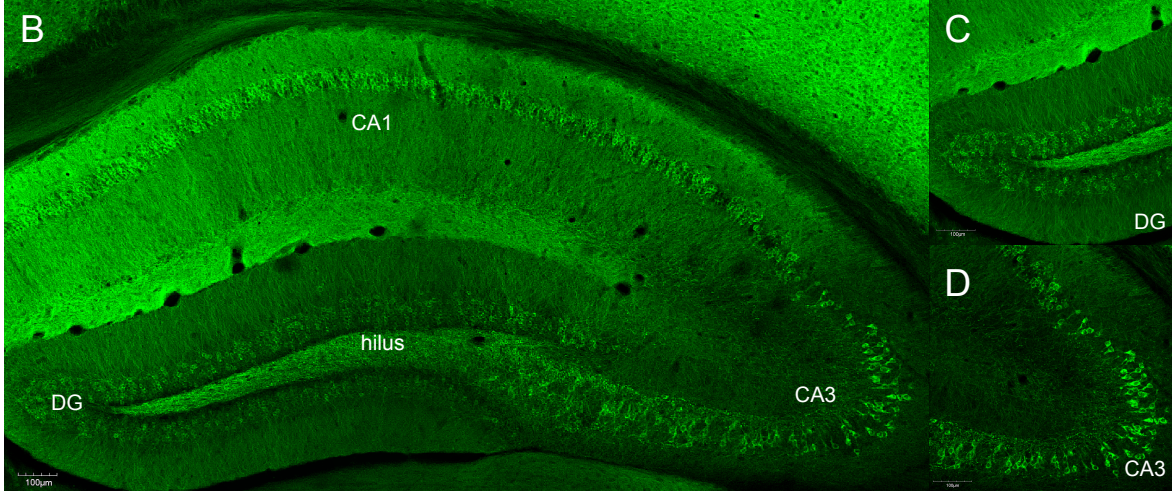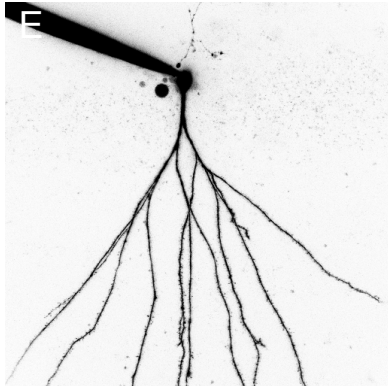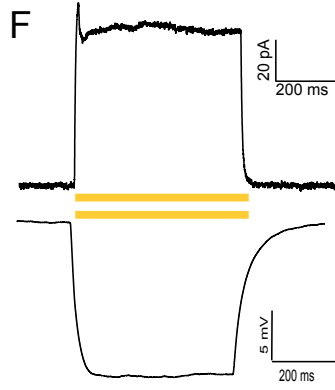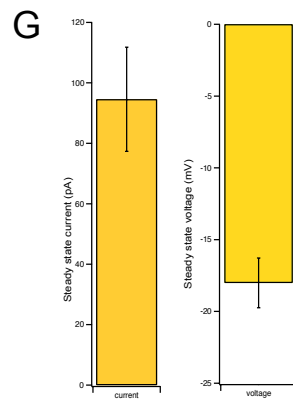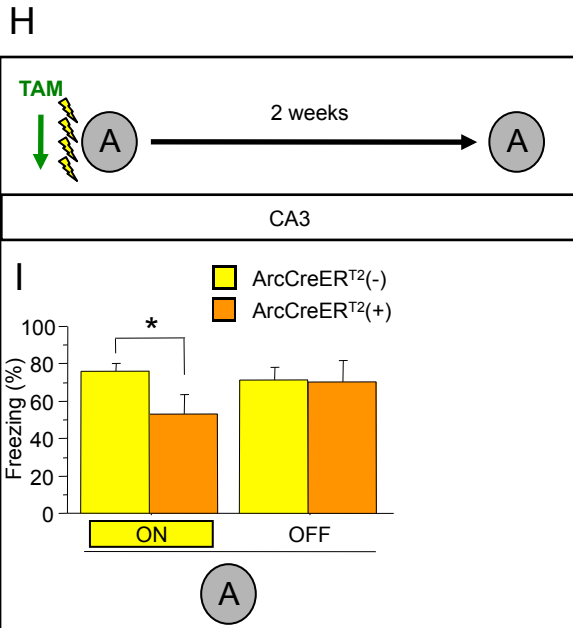

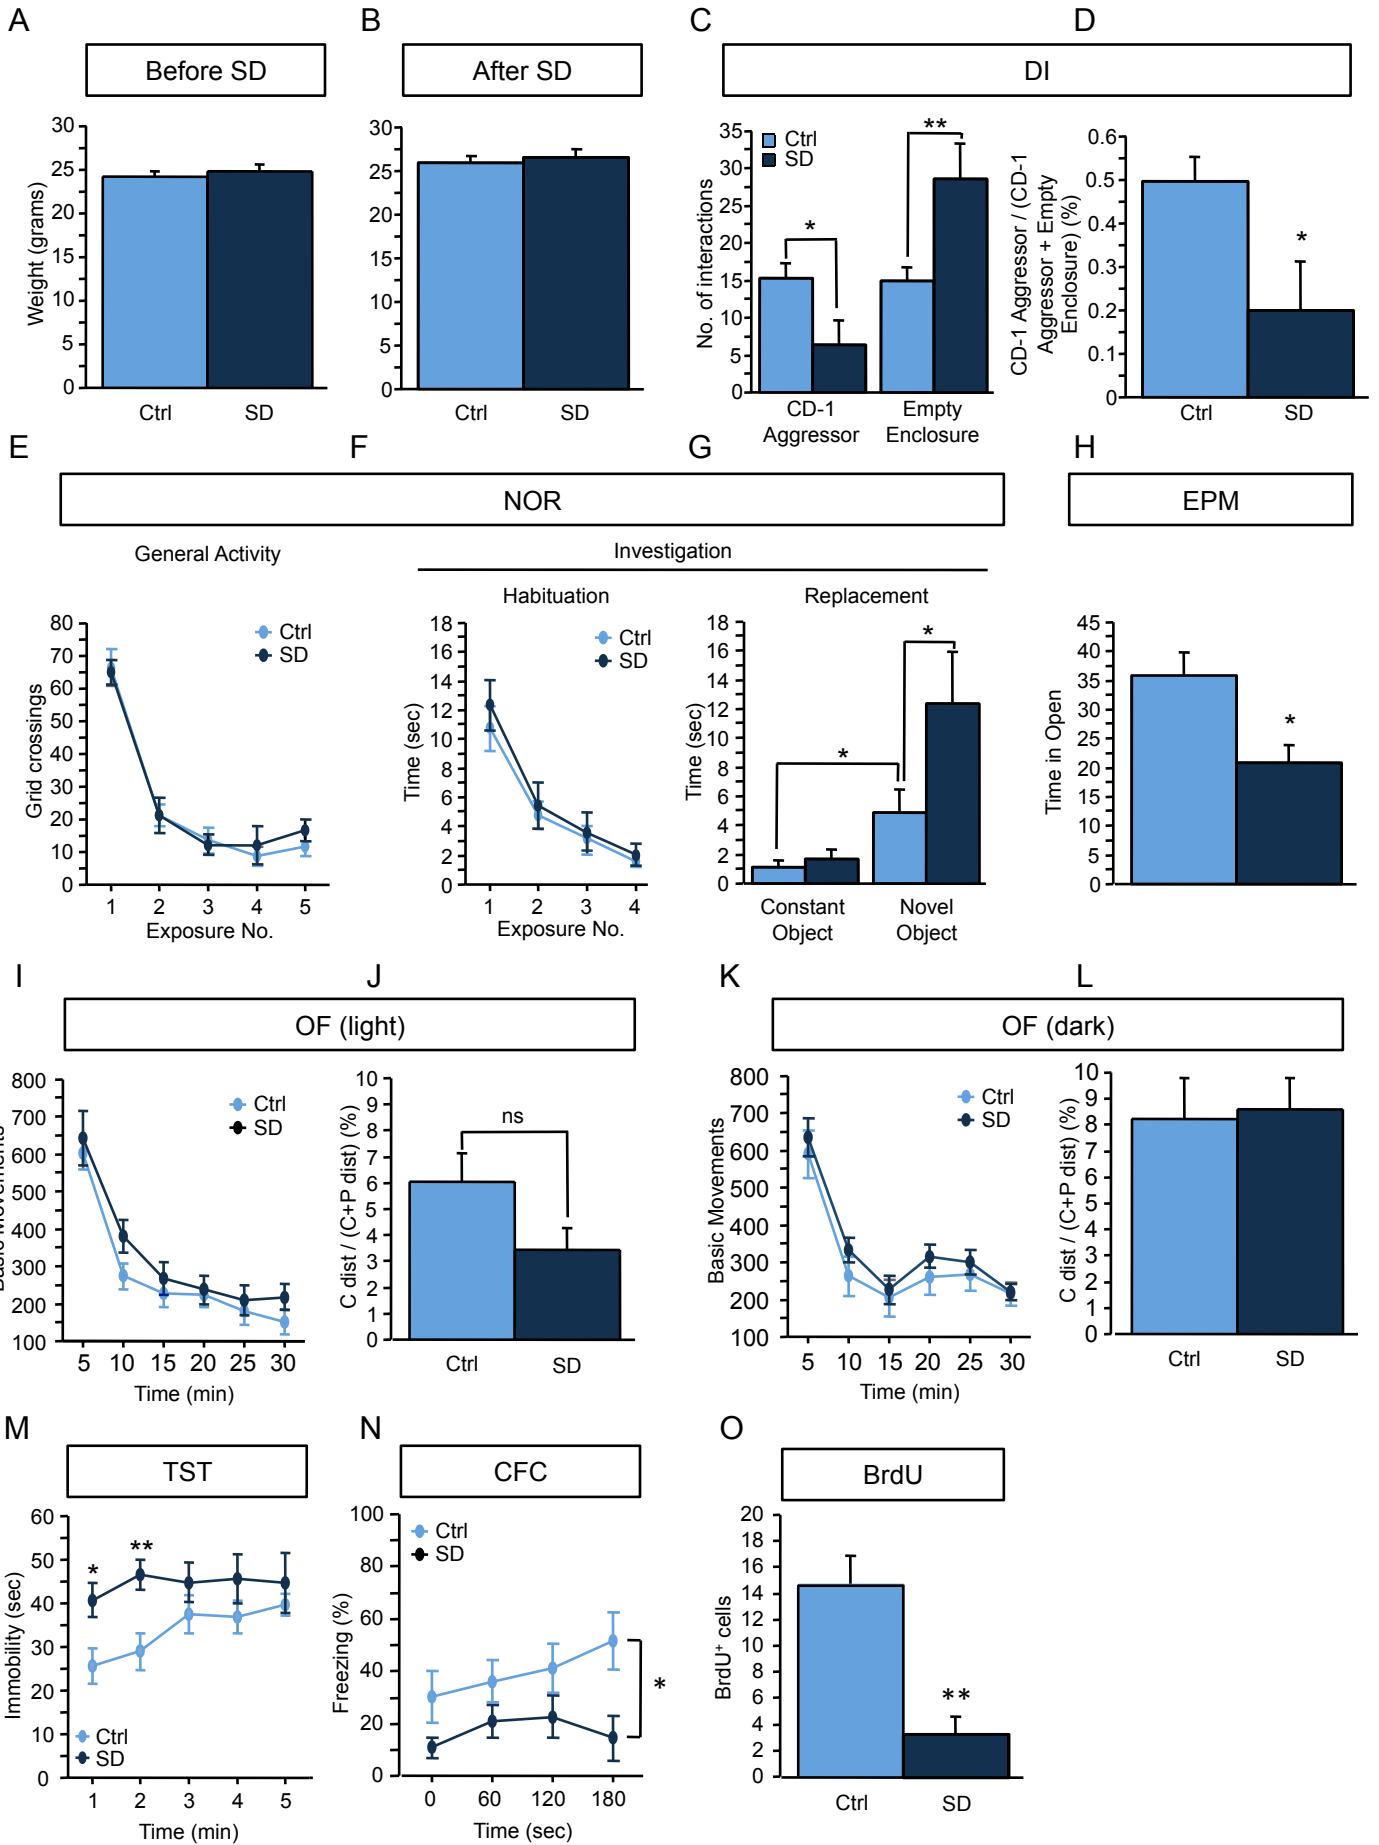

**A**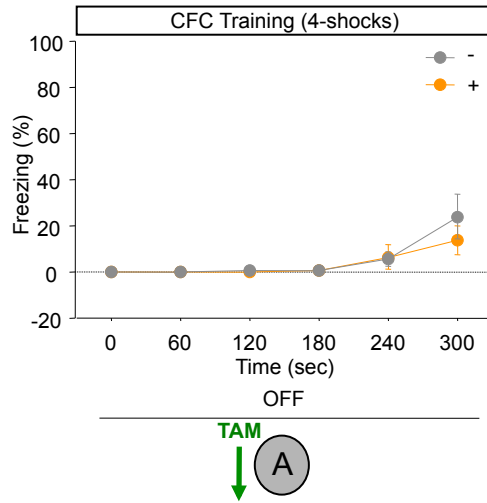**B**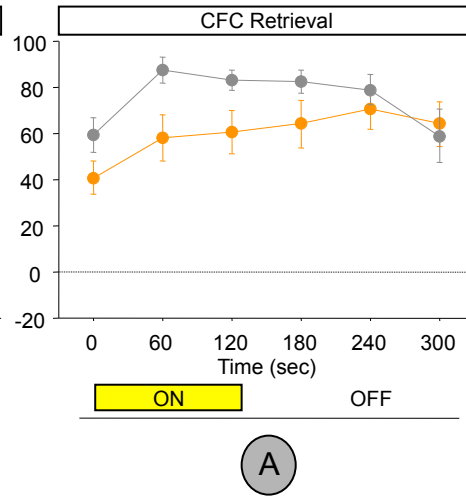

Supplement: NIHMS610348-supplement-02.pdf [file NIHMS610348-supplement-02.pdf]
